# Supplementary material
Source: Springer Nature journal article supplement (https://www.springermedizin.de/resource/supplementary/13049_2010_236_MOESM1_ESM.pdf/9666074)

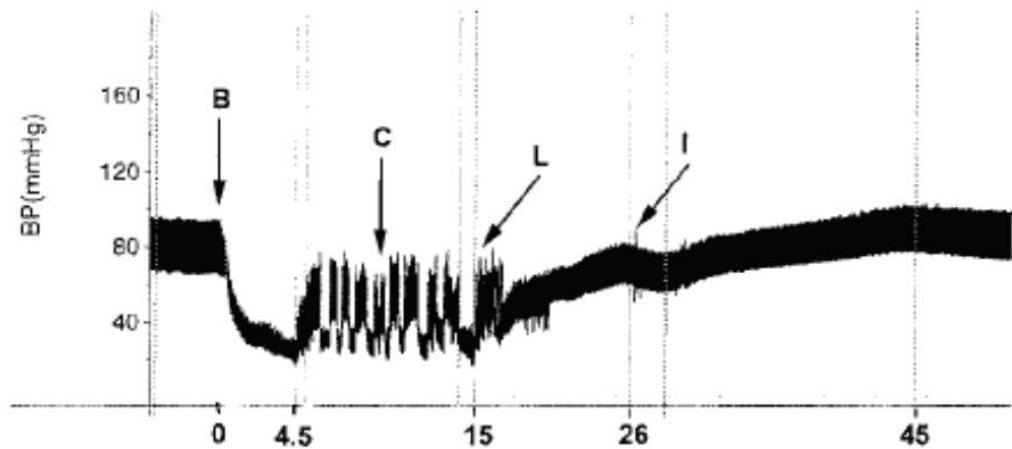

Supplement: MOESM1 [file 9666074]
